# Supplementary material for: Robust triplet–triplet annihilation photon upconversion by efficient oxygen scavenging
Source: Royal Society of Chemistry journal article supplement (doi:10.1039/c7pp00201g), 2017-07-05
Supplement: c7pp00201g1.pdf [file c7pp00201g1.pdf]

**Electronic Supplementary Information:**

**Robust Triplet-Triplet Annihilation Photon  
Upconversion by Efficient Oxygen Scavenging**

Damir Dzebo, Kasper Moth-Poulsen, Bo Albinsson\*

Chalmers University of Technology/Department of Chemistry and Chemical Engineering,  
41296 Gothenburg, Sweden

# Contents

|   |                               |     |
|---|-------------------------------|-----|
| 1 | Sample degradation            | S3  |
| 2 | Nitrogen deoxygenated samples | S14 |
| 3 | Freeze-pump-thaw samples      | S15 |
| 4 | Lifetime measurements         | S17 |

## List of Figures

|                                                                                        |     |
|----------------------------------------------------------------------------------------|-----|
| Fig. S1 –Abs: 10 mM DMS, high conc. TTA-UC . . . . .                                   | S3  |
| Fig. S2 –Abs: 500 mM BME, high conc. TTA-UC . . . . .                                  | S4  |
| Fig. S3 –Abs: 100 mM BME, high conc. TTA-UC . . . . .                                  | S5  |
| Fig. S4 –Abs: 500 mM DMS, low conc. TTA-UC . . . . .                                   | S6  |
| Fig. S5 –Abs: 500 mM DPropS, low conc. TTA-UC . . . . .                                | S7  |
| Fig. S6 –Abs: 500 mM DMTM, low conc. TTA-UC . . . . .                                  | S8  |
| Fig. S7 –Abs: 500 mM PDFP, low conc. TTA-UC . . . . .                                  | S9  |
| Fig. S8 –Abs: 500 mM DMDS, low conc. TTA-UC . . . . .                                  | S10 |
| Fig. S9 –Abs: 500 mM ChDS, low conc. TTA-UC . . . . .                                  | S11 |
| Fig. S10 –Abs: 500 mM DPS, low conc. TTA-UC . . . . .                                  | S12 |
| Fig. S11 –Abs: 500 mM DBS, low conc. TTA-UC . . . . .                                  | S13 |
| Fig. S12 –Abs: 500 mM DMTM, 240 min irradiation, low conc. TTA-UC . . . . .            | S14 |
| Fig. S13 –Abs: no scavenger, 90 min irradiation, low conc. TTA-UC . . . . .            | S15 |
| Fig. S14 –Abs: 500 mM DMTM, 90 min irradiation, low conc. TTA-UC . . . . .             | S16 |
| Fig. S15 –PdOEP lifetime with scavenger and without scavenger but FPT-purged . . . . . | S17 |

# 1 Sample degradation

Below are the absorption spectra of the atmosphere-equilibrated samples before and after 30 min of irradiation at 532 nm in completely filled vials closed with screw cap.

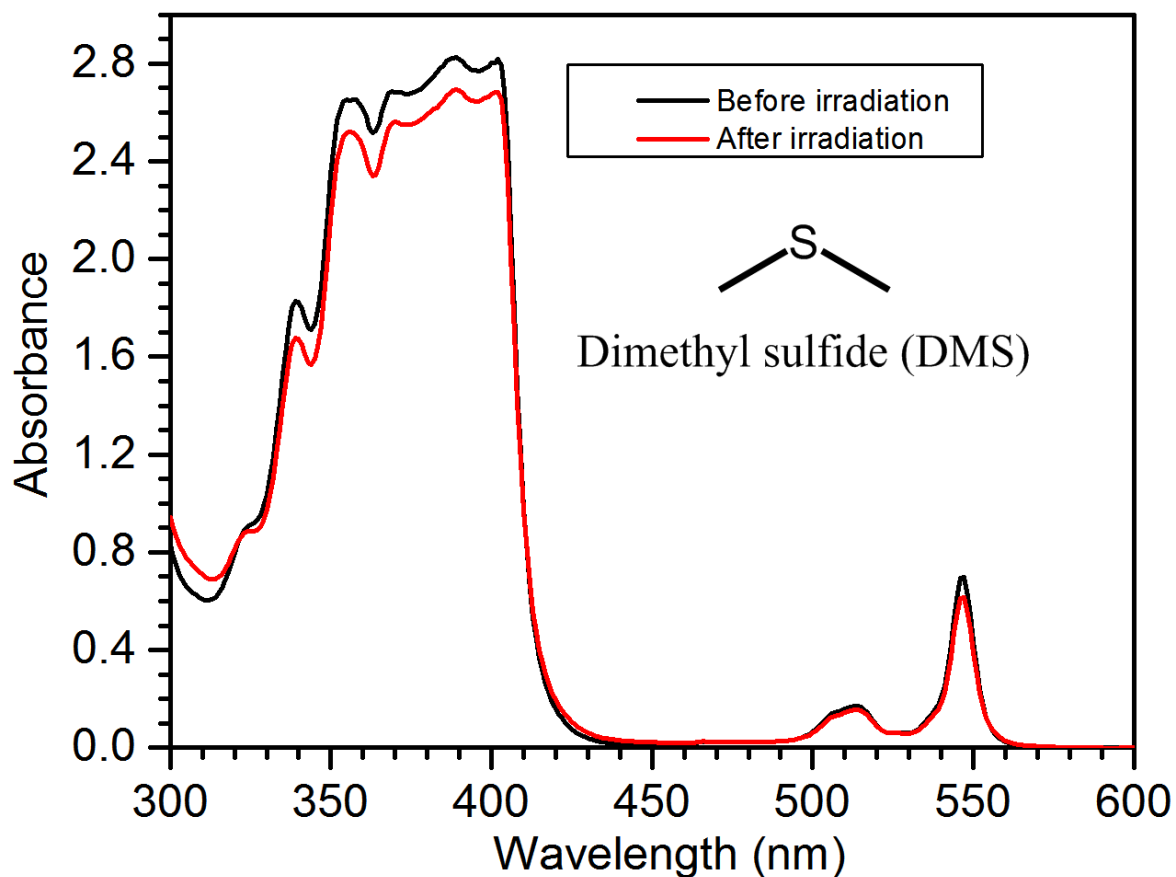

Fig. S1: Absorption spectra before and after the irradiation at 532 nm (30 min) in presence of 10 mM of DMS as scavenger with high concentration TTA-UC system.

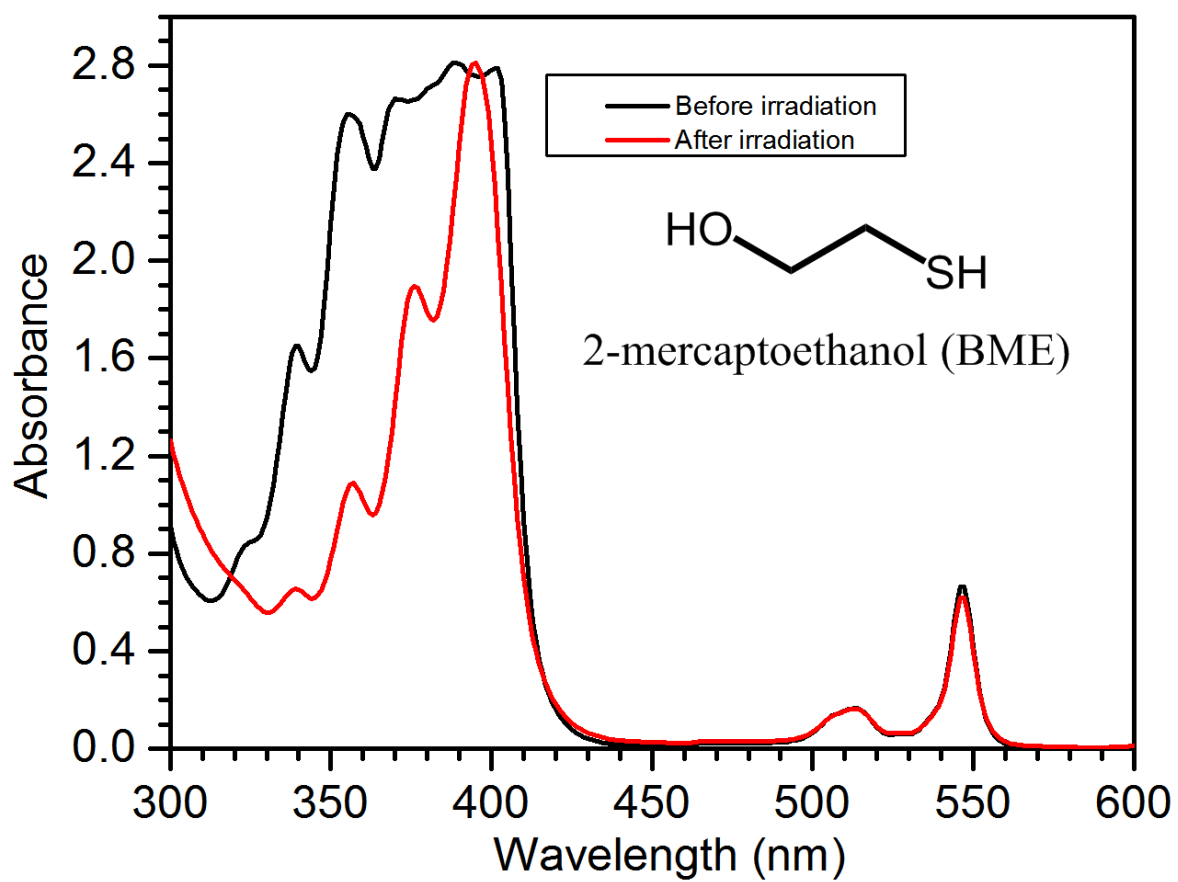

Fig. S2: Absorption spectra before and after the irradiation at 532 nm (30 min) in presence of 500 mM of BME as scavenger with high concentration TTA-UC system.

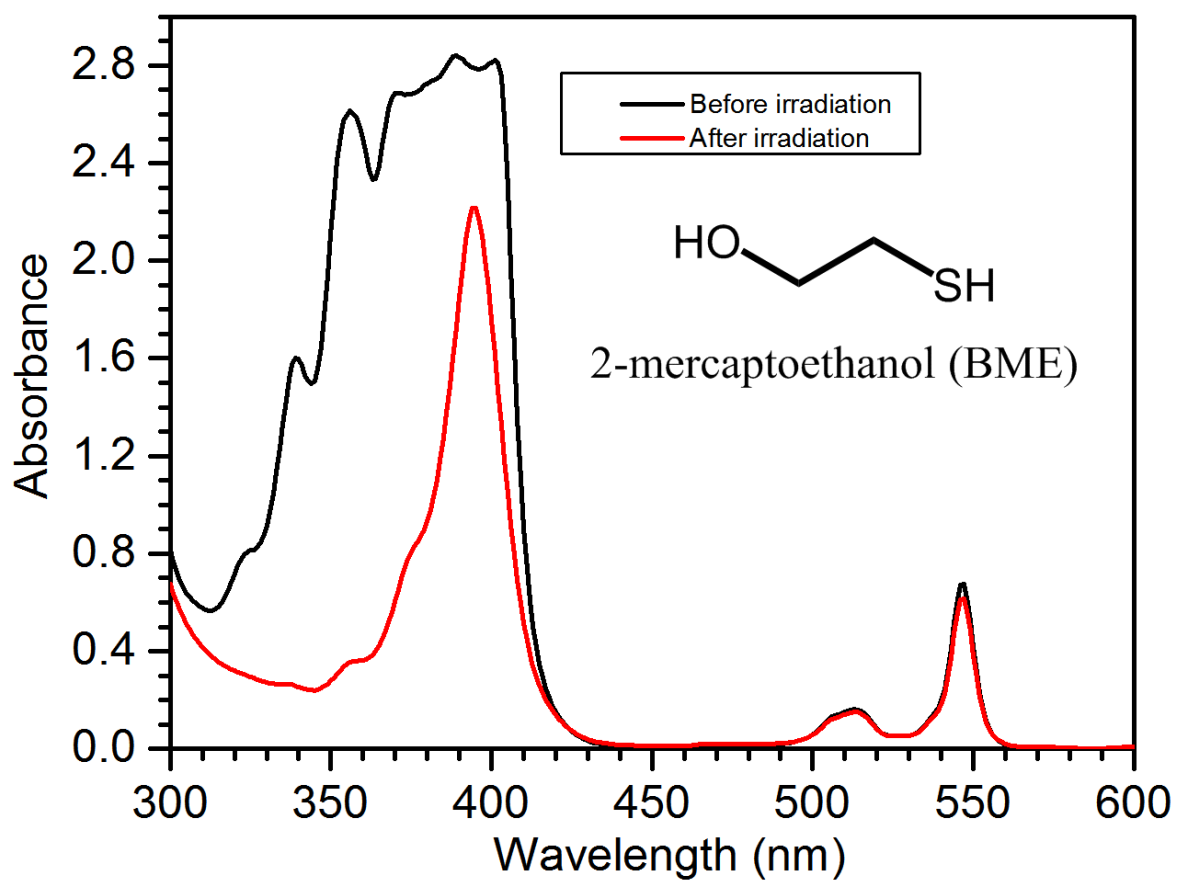

Fig. S3: Absorption spectra before and after the irradiation at 532 nm (30 min) in presence of 100 mM of BME as scavenger with high concentration TTA-UC system.

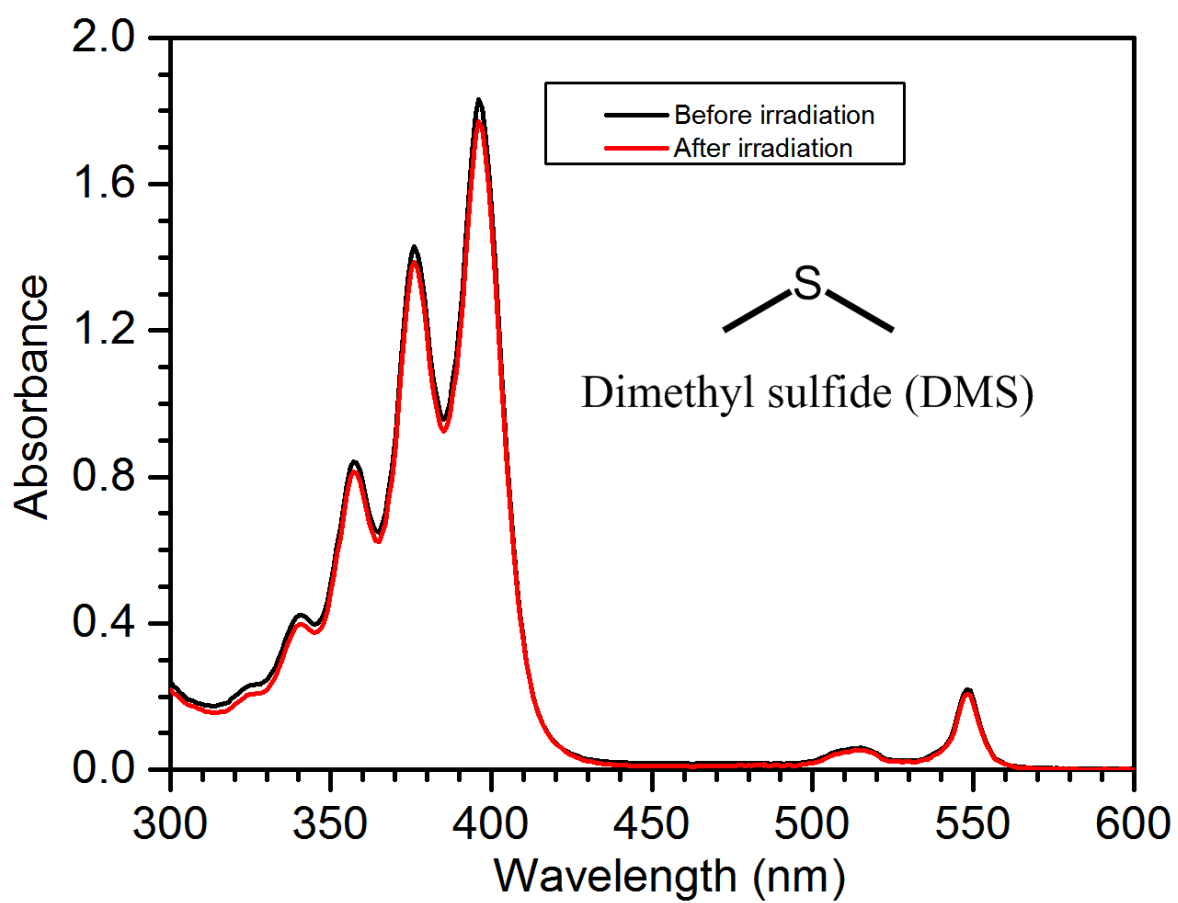

Fig. S4: Absorption spectra before and after the irradiation at 532 nm (30 min) in presence of 500 mM of DMS as scavenger with low concentration TTA-UC system.

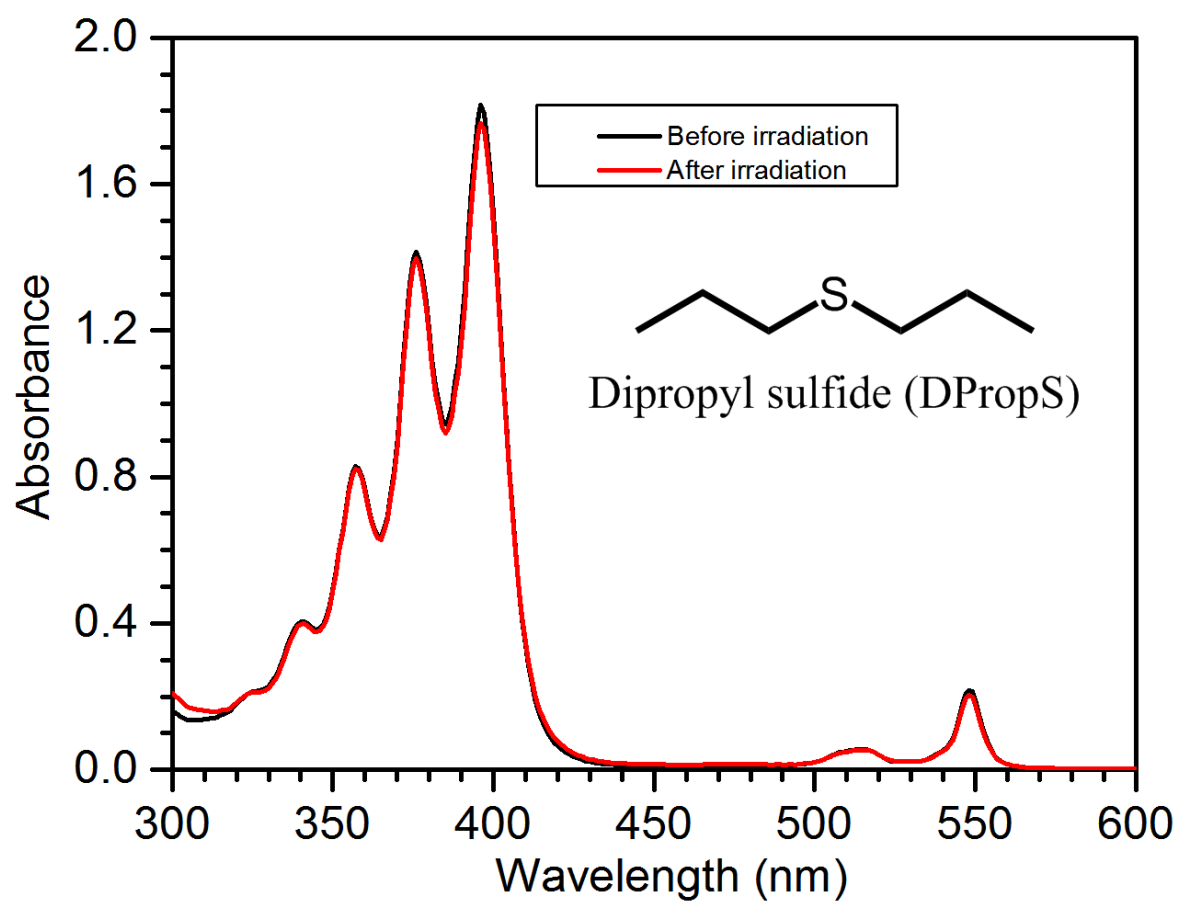

Fig. S5: Absorption spectra before and after the irradiation at 532 nm (30 min) in presence of 500 mM of DPropS as scavenger with low concentration TTA-UC system.



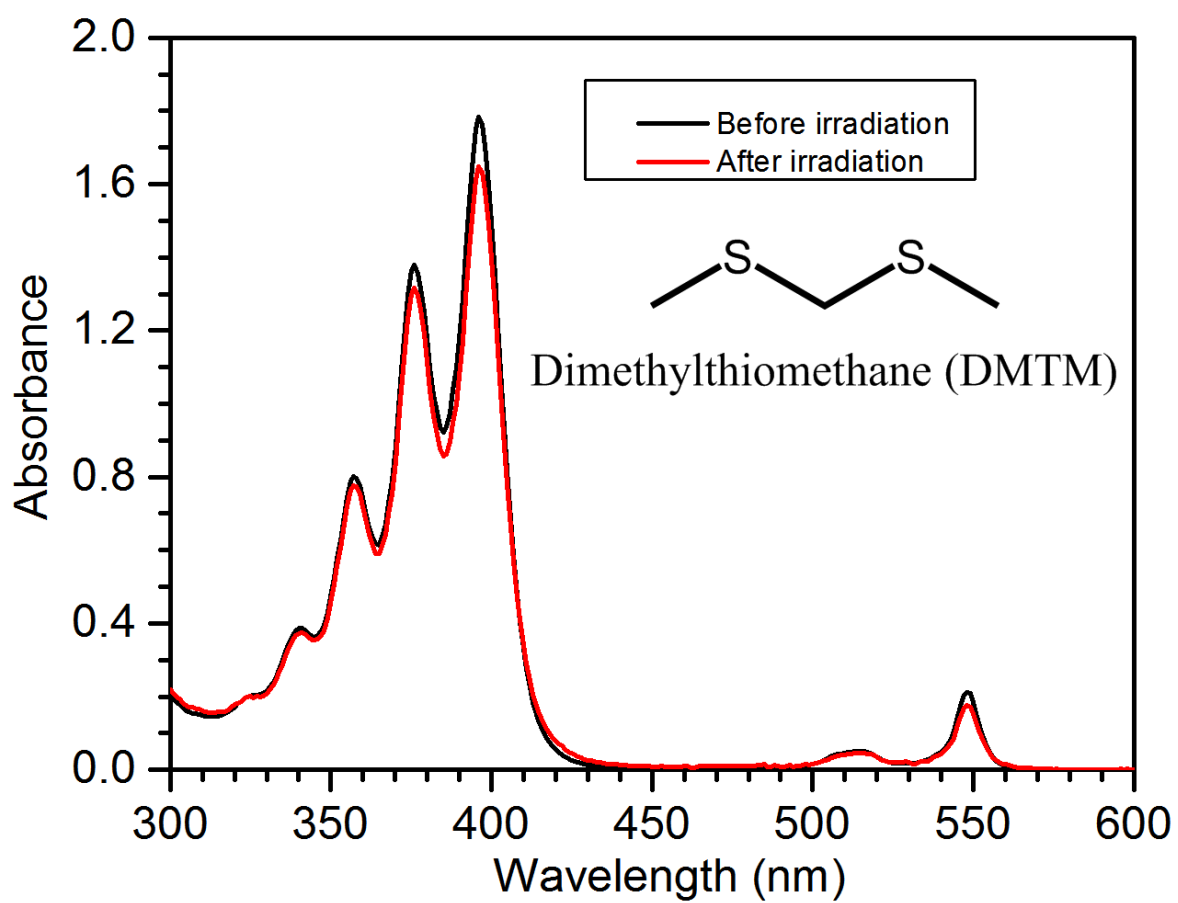

Fig. S6: Absorption spectra before and after the irradiation at 532 nm (30 min) in presence of 500 mM of DMTM as scavenger with low concentration TTA-UC system.

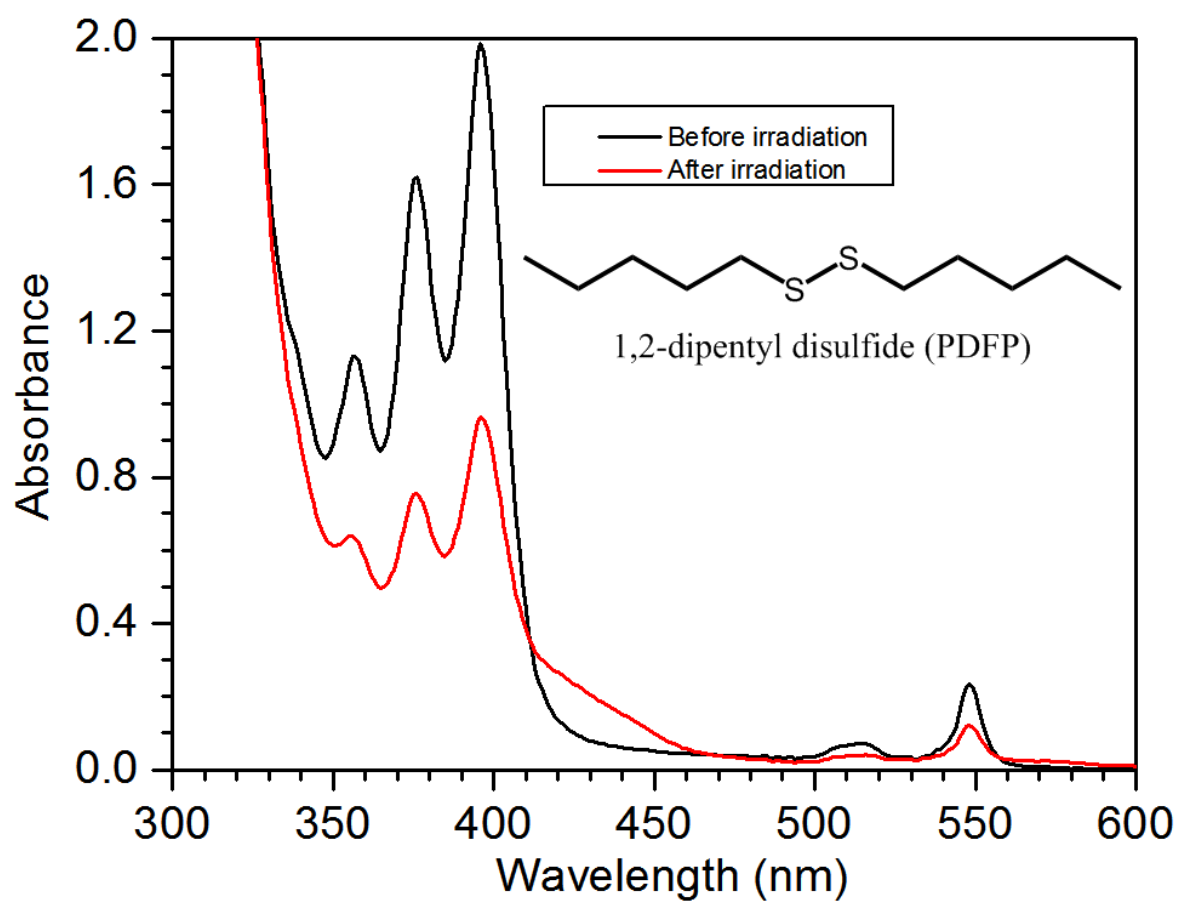

Fig. S7: Absorption spectra before and after the irradiation at 532 nm (30 min) in presence of 500 mM of PDFP as scavenger with low concentration TTA-UC system.

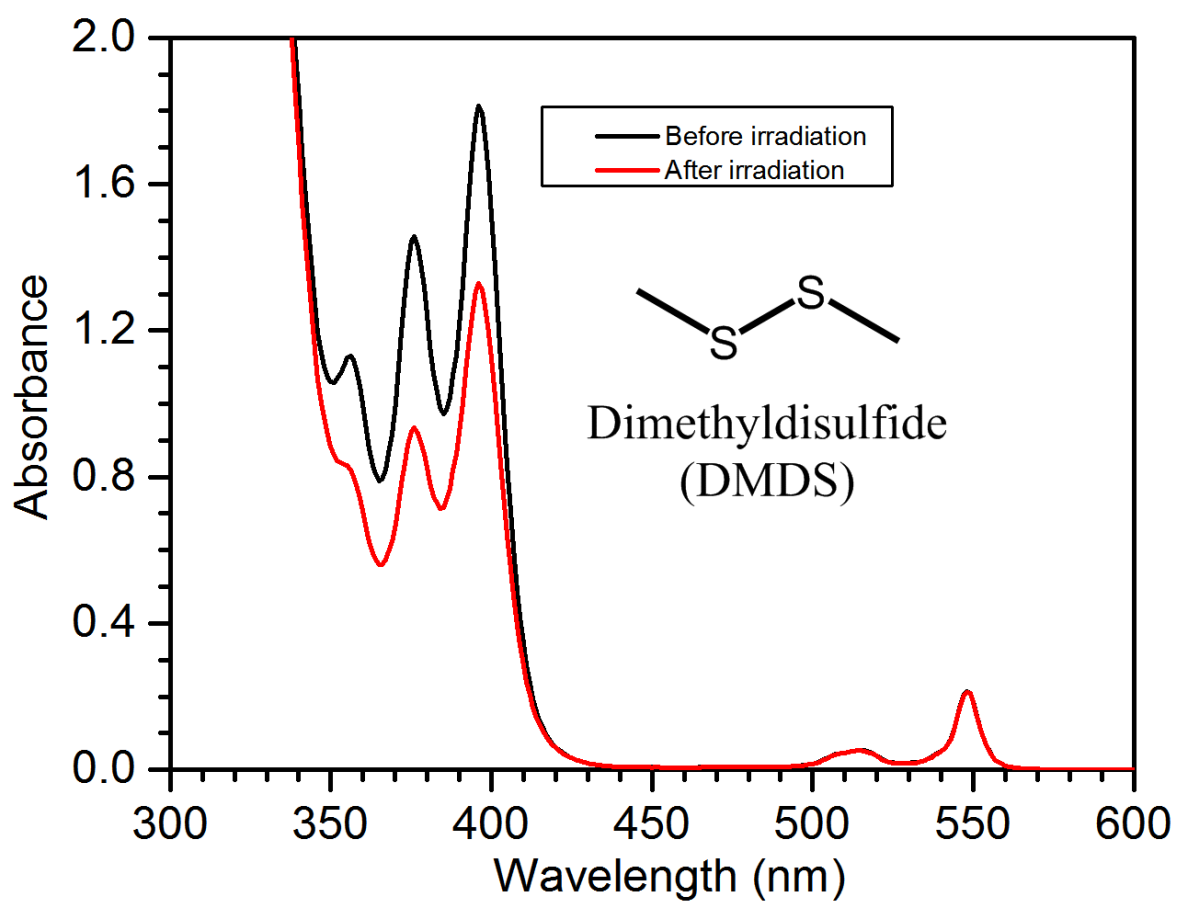

Fig. S8: Absorption spectra before and after the irradiation at 532 nm (30 min) in presence of 500 mM of DMDS as scavenger with low concentration TTA-UC system.

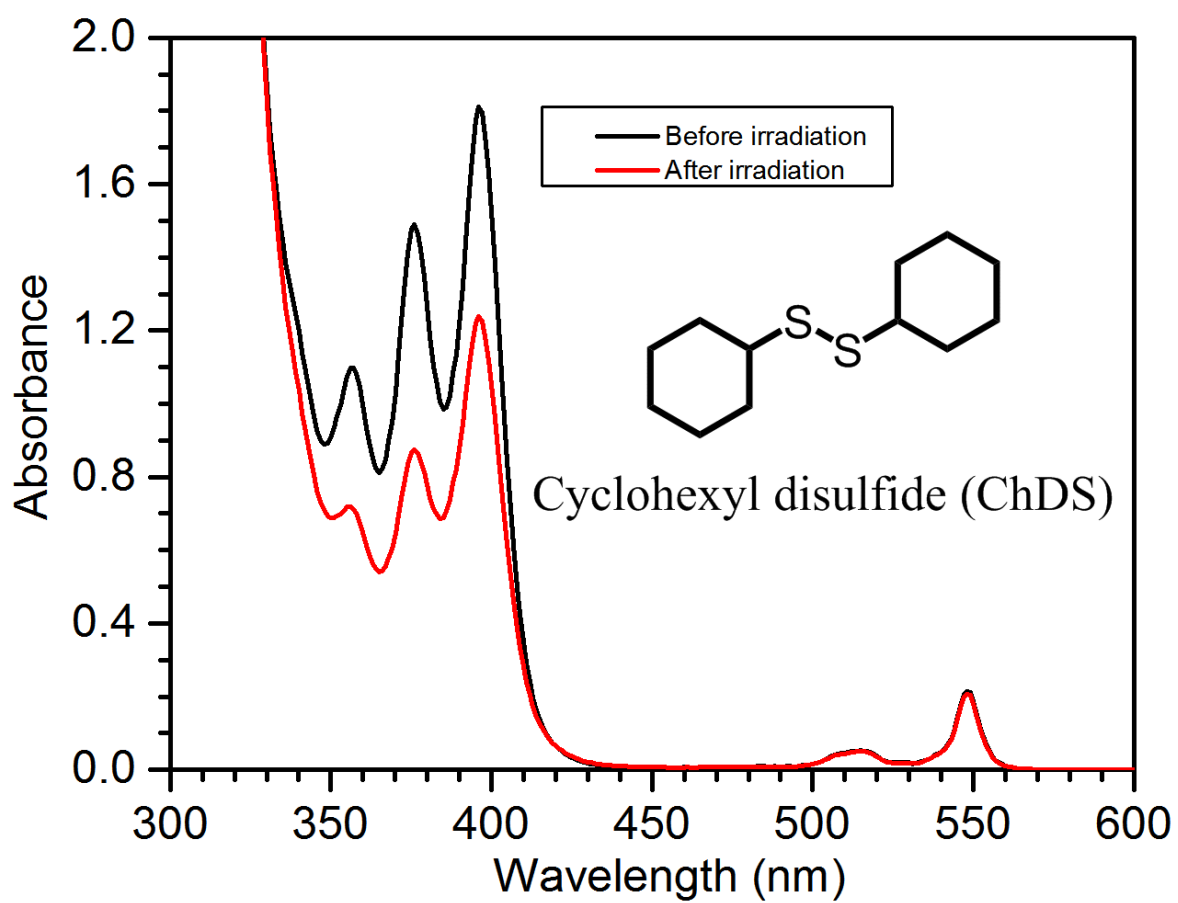

Fig. S9: Absorption spectra before and after the irradiation at 532 nm (30 min) in presence of 500 mM of ChDS as scavenger with low concentration TTA-UC system.

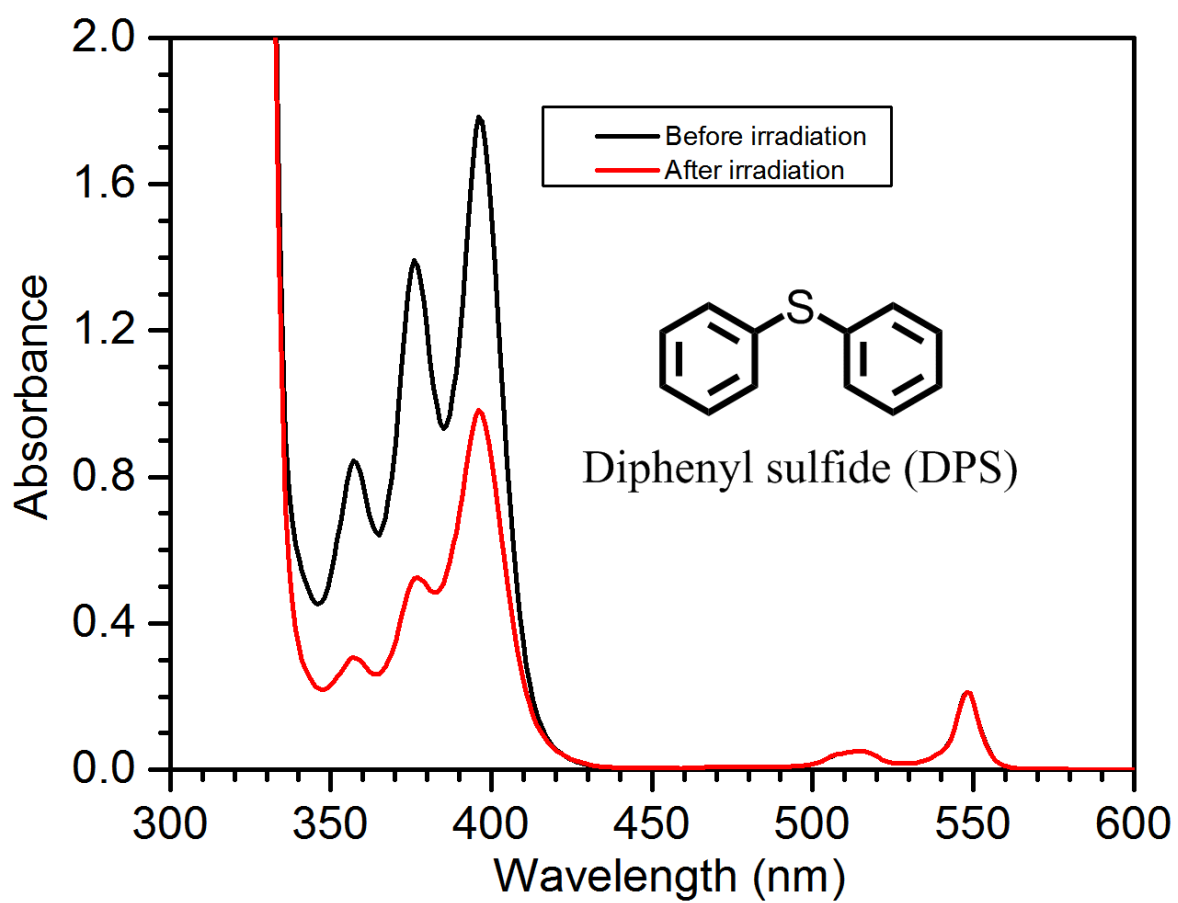

Fig. S10: Absorption spectra before and after the irradiation at 532 nm (30 min) in presence of 500 mM of DPS as scavenger with low concentration TTA-UC system.

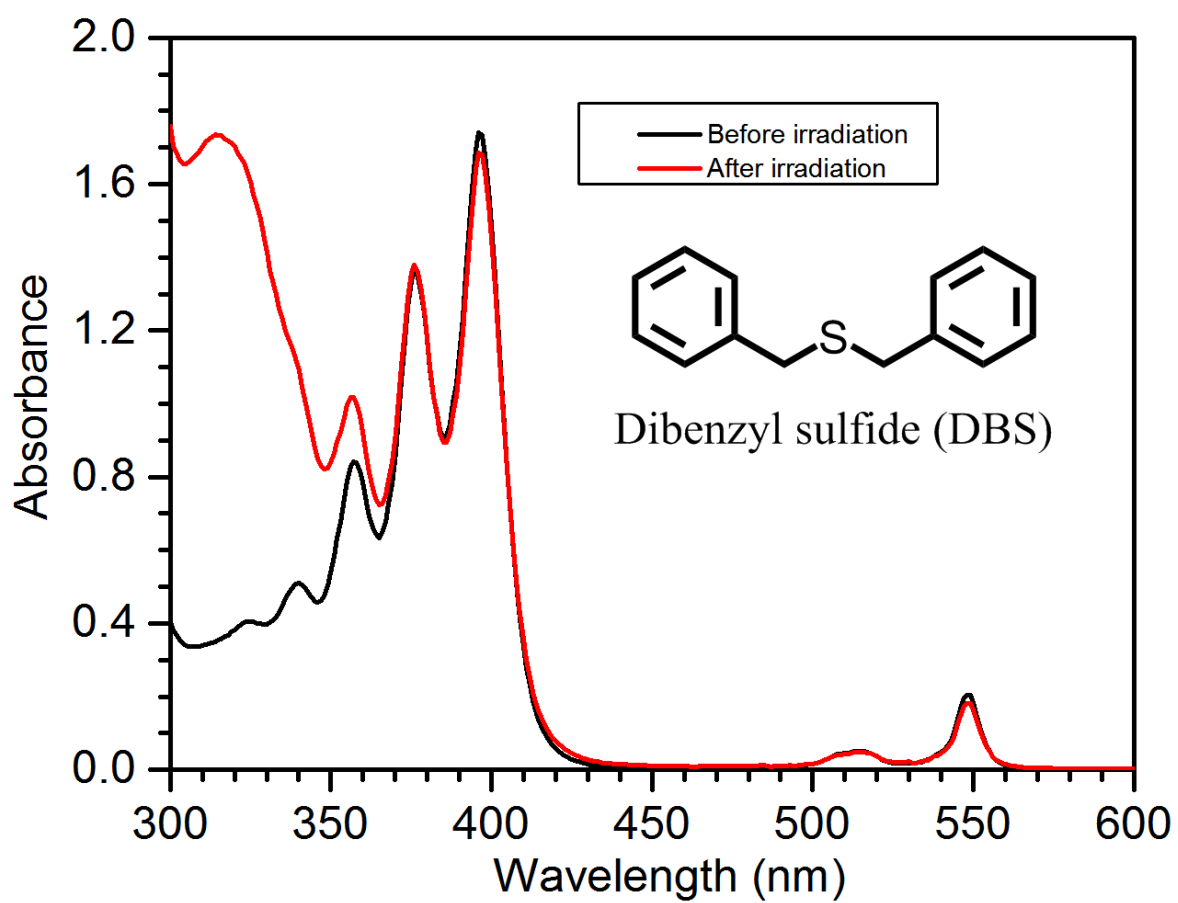

Fig. S11: Absorption spectra before and after the irradiation at 532 nm (30 min) in presence of 500 mM of DBS as scavenger with low concentration TTA-UC system.

## 2 Nitrogen deoxygenated samples

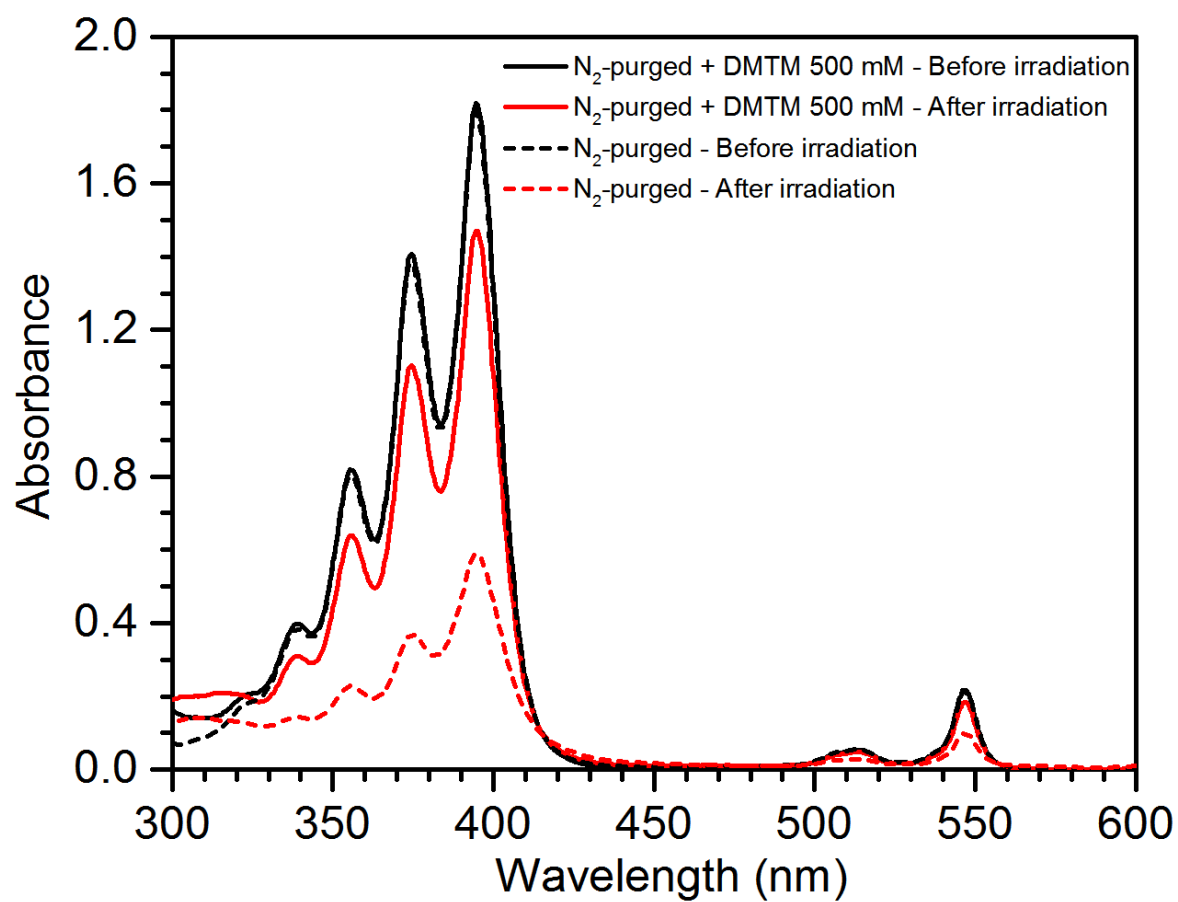

Fig. S12: Absorption spectra before and after the irradiation at 532 nm (240 min) of N<sub>2</sub>-gas purged samples in presence and absence of 500 mM of DMTM as scavenger with the low concentration TTA-UC system.

### 3 Freeze-pump-thaw samples

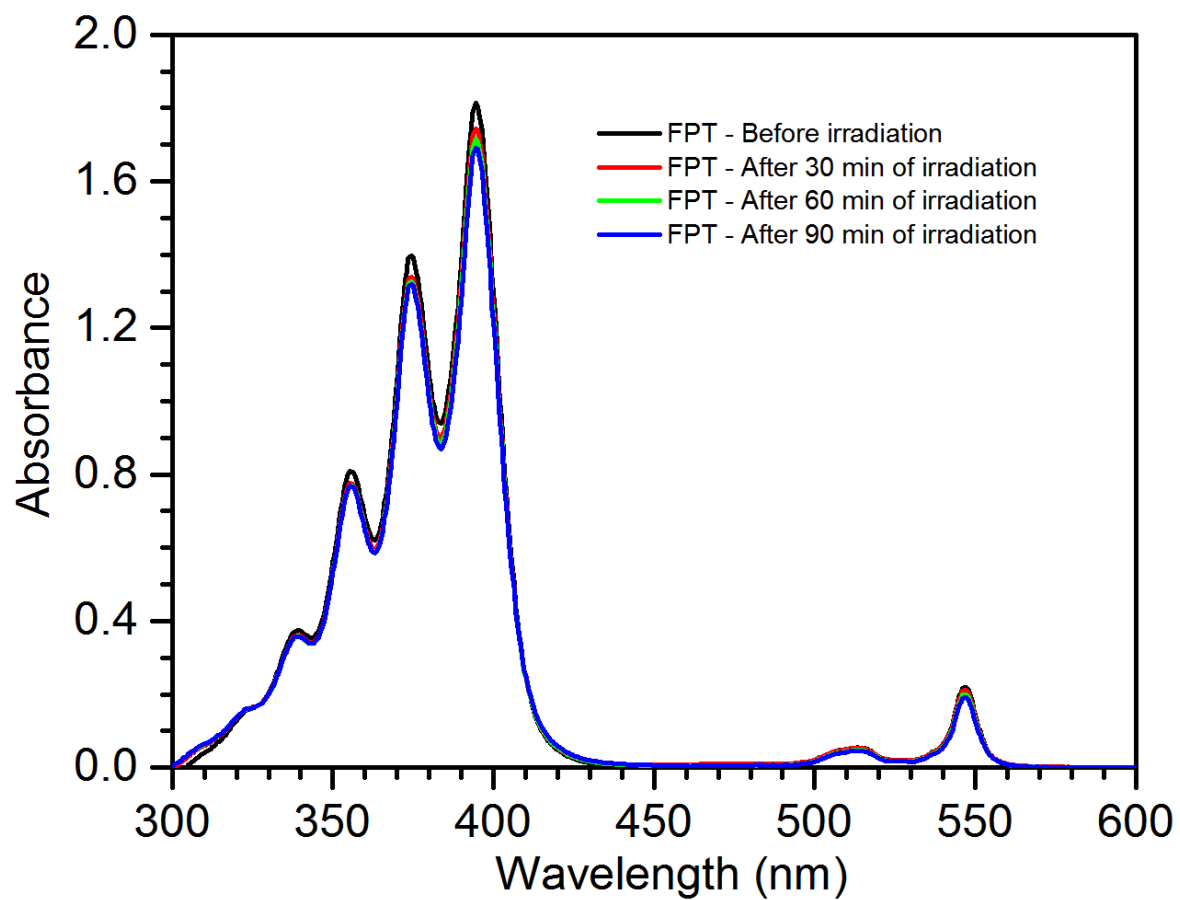

Fig. S13: Absorption spectra before, during and after the irradiation at 532 nm (90 min) of sample with the low concentration TTA-UC system.



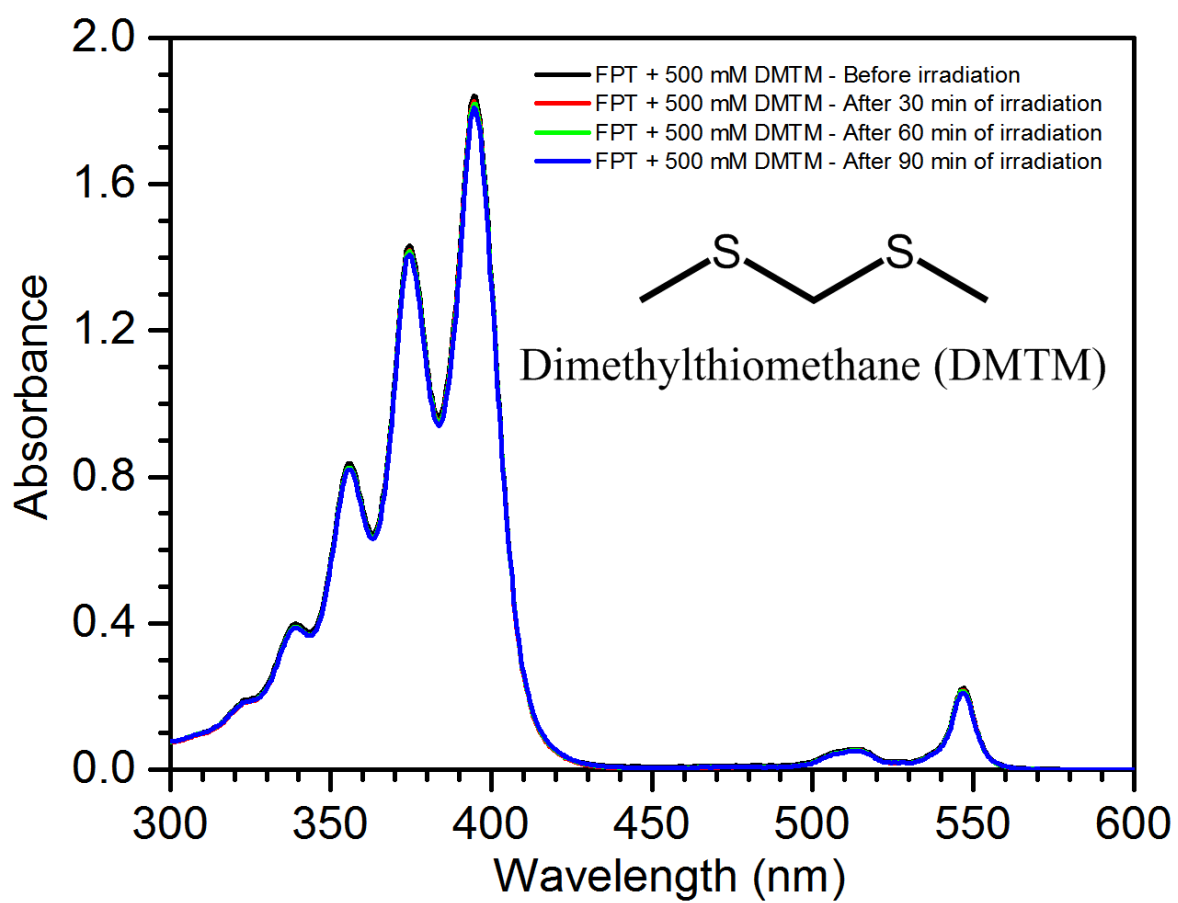

Fig. S14: Absorption spectra before and during the irradiation at 532 nm (90 min) of samples in presence of 500 mM of DMTM as scavenger with the low concentration TTA-UC system.

## 4 Lifetime measurements

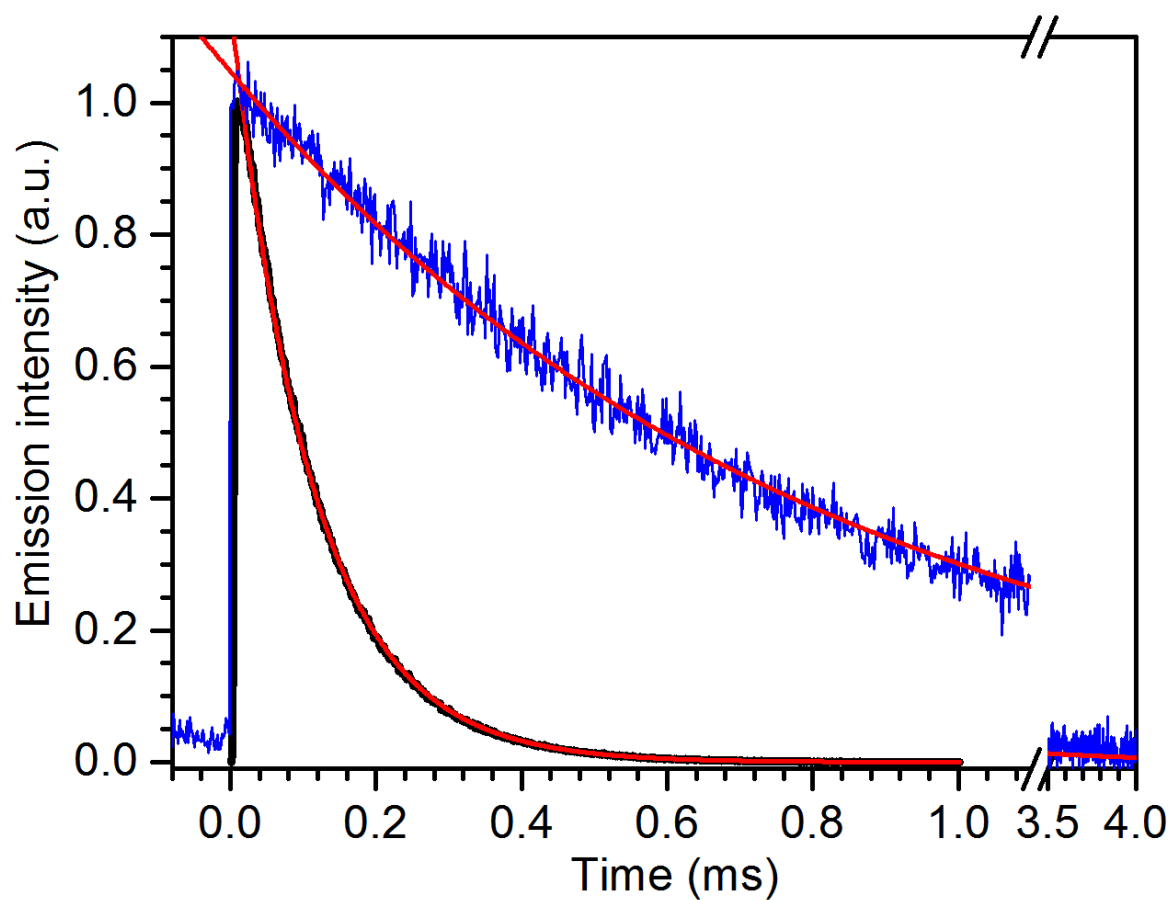

Fig. S15: Phosphorescence lifetime measurements of PdOEP in toluene with 500 mM DMS scavenger (black) and without scavenger degassed using freeze-pump-thaw method (blue). The data was fit well with mono exponential decay (red) revealing a lifetime of 112  $\mu\text{s}$  for the scavenged sample and 770  $\mu\text{s}$  for the freeze-pump-thaw degassed sample. Excitation wavelength was at 547 nm and emission was captured at 660 nm.
